# Supplementary material
Source: publisher site journal article supplement (https://www.dovepress.com/article/442985)
Supplement: Supplementary file 1 [file get_supplementary_file.php]

**Supplementary Material**

**Supplementary Figure 1. Fundoscopic examination of the child revealing pale optic disc; A – Left Eye, B – Right Eye; arrow points at the optic disc**

**
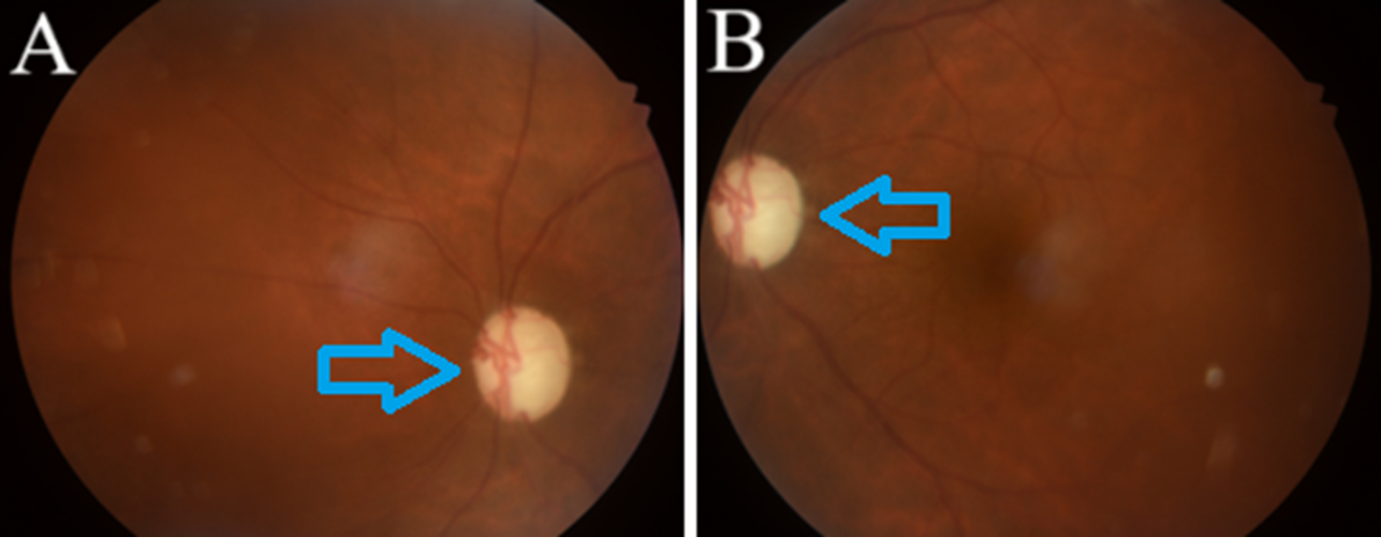
**

**Supplementary Table 1. Developmental Quotient Assessment of the boy**

| **Developmental Domain** | **Developmental Quotient** | **Inference** |
| --- | --- | --- |
| Gross Motor Skills | 75% (Stood without support at 16 Months) | Moderate Delay |
| Fine Motor Skills | 65% (Grasps were delayed) | Severe Delay |
| Language Skills | 81% (Said Mama at 11 months) | Mild Delay |
| Social & Adaptive Skills | 90% (Waved hands at 10 months) | Normal |

**Supplementary Table 2. Boy’s Anthropometric Measurements and Deviations**

| **Parameter** | **Observed** | **Ideal** | **Standard Deviation** |
| --- | --- | --- | --- |
| Weight | 26 kg | 32.5 kg | Less than 25th Percentile |
| Height | 123 cm | 137 cm | Less than 3rd Percentile |
| Head Circumference | 53 cm | - |  |
| Body Mass Index | 17.18 kg/m2 | 18.5 to 24.9 kg/m2 | 50th to 23rd adult equivalent |
